CORRECTION

# Correction: P-TEFb, the Super Elongation Complex and Mediator Regulate a Subset of Non-paused Genes during Early *Drosophila* Embryo Development

The *PLOS Genetics* Staff

## Notice of Republication

This article was republished on May 26, 2015, to include details of the editor who handled the submission, which had been omitted due to an error in production. Please download this article again to view the correct version. The originally published, uncorrected article and the republished, corrected article are provided here for reference.

## Supporting Information

**S1 File. Originally published, uncorrected article.**  
(PDF)

**S2 File. Republished corrected article.**  
(PDF)

## Reference

1. Dahlberg O, Shilkova O, Tang M, Holmqvist P-H, Mannervik M (2015) P-TEFb, the Super Elongation Complex and Mediator Regulate a Subset of Non-paused Genes during Early *Drosophila* Embryo Development. *PLoS Genet* 11(2): e1004971. doi:[10.1371/journal.pgen.1004971](https://doi.org/10.1371/journal.pgen.1004971) PMID: [25679530](https://pubmed.ncbi.nlm.nih.gov/25679530/)

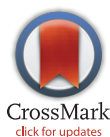

## OPEN ACCESS

**Citation:** The *PLOS Genetics* Staff (2015) Correction: P-TEFb, the Super Elongation Complex and Mediator Regulate a Subset of Non-paused Genes during Early *Drosophila* Embryo Development. *PLoS Genet* 11(6): e1005319. doi:[10.1371/journal.pgen.1005319](https://doi.org/10.1371/journal.pgen.1005319)

**Published:** June 15, 2015

**Copyright:** © 2015 The *PLOS Genetics* Staff. This is an open access article distributed under the terms of the [Creative Commons Attribution License](https://creativecommons.org/licenses/by/4.0/), which permits unrestricted use, distribution, and reproduction in any medium, provided the original author and source are credited.
